# Supplementary material for: Predicting Subject Traits From Brain Spectral Signatures: An Application to Brain Ageing
Source: PubMed Central journal article supplement (PMC11660765; doi:10.1002/hbm.70096), 2024-12-20
Supplement: HBM-45-e70096-s001.pdf [file HBM-45-e70096-s001.pdf]

# Predicting subject traits from brain spectral signatures: an application to brain ageing (SI)

Cecilia Jarne<sup>a,b,c</sup>, Ben Griffin<sup>e</sup>, Diego Vidaurre<sup>c,1</sup>

<sup>a</sup>*Departamento de Ciencia y Tecnologia de la Universidad Nacional de Quilmes, Bernal, Buenos Aires, Argentina*

<sup>b</sup>*CONICET, Buenos Aires, Argentina*

<sup>c</sup>*Center of Functionally Integrative Neuroscience, Department of Clinical Medicine, Aarhus University, Aarhus, Denmark*

<sup>d</sup>*Nuffield Department of Clinical Neurosciences, Oxford University, Oxford, UK*

<sup>e</sup>*Oxford Centre for Human Brain Activity, Department of Psychiatry, Oxford University, Oxford, UK*

| Country     | Dataset sites         | Synapse Name | N individuals (Female; Male) | Age range | Device     |
|-------------|-----------------------|--------------|------------------------------|-----------|------------|
| Barbados    | Barbados_1978 ([1])   | Barbados     | 62 (F28; M34)                | 5.5–11.4  | DEDAAS     |
| China       | Chengdu_2014 ([2])    | Chengdu      | 33 (F7; M26)                 | 21–28     | BrainAmp   |
|             | Chongqing_2016 ([3])  | Chongqing    | 235 (F134; M101)             | 15–26     | BrainAmp   |
| Colombia    | Colombia_2019         | Colombia     | 21 (F13; M8)                 | 22–45     | Neuro scan |
| Cuba        | Cuba_90 ([4])         | Cuba90       | 195 (F98; M97)               | 5.5–97    | Medicid-3M |
|             | Cuba_2003 ([5])       | Cuba2003     | 48 (F28; M20)                | 5–69      | Medicid-4  |
|             | Cuba_2004 (?)         | Cuba2004     | 14 -                         | 22–48     | ?          |
|             | CHBMP ([6])           | CHBMP        | 124 (F27; M97)               | 17–62     | Medicid-5  |
| Germany     | Germany_2013 ([7])    | Germany      | 178 (F113; M65)              | 22.5–77.5 | BrainAmp   |
| Malaysia    | Malaysia_2017         | Malaysia     | 26 (F24; M2)                 | 19–60     | ANT Neuro  |
| Russia      | Russia_2013 ([8])     | Russia       | 58 (F34; M24)                | 18–49     | nvx136     |
|             |                       | same         | 145 (F70; M75)               | 16–57     | actiCHamp  |
| Switzerland | Bern_1980 ([9])       | Bern         | 44 (F18; M26)                | 10–16     | Nihon Koh  |
|             | Zurich_2017 ([10])    | Switzerland  | 165 (F80; M85)               | 18–90     | EGI-256 HC |
| USA         | New York_1970s ([11]) | NewYork      | 230 (F109; M121)             | 6–80.5    | DEDAAS     |
|             | Total                 |              | 1564 (F783; M781)            |           |            |

Table 1: Multi-national EEG norms dataset as described in [12]. It consist of 9 countries, 12 devices and 14 batches.

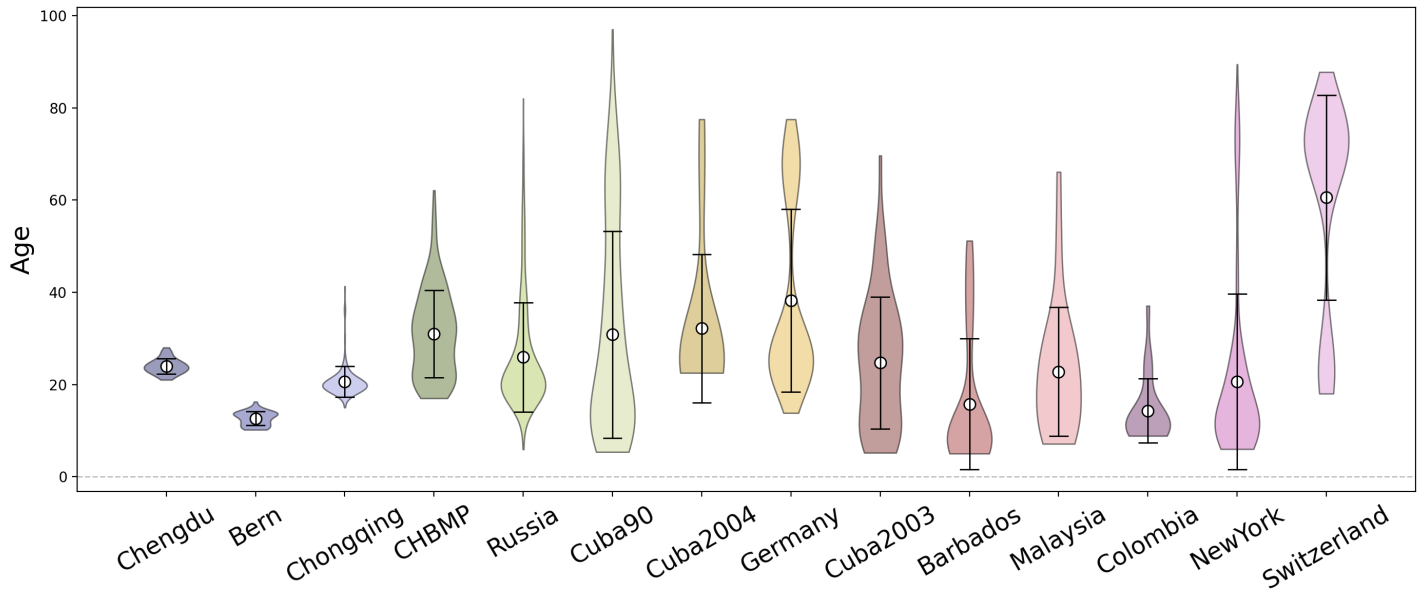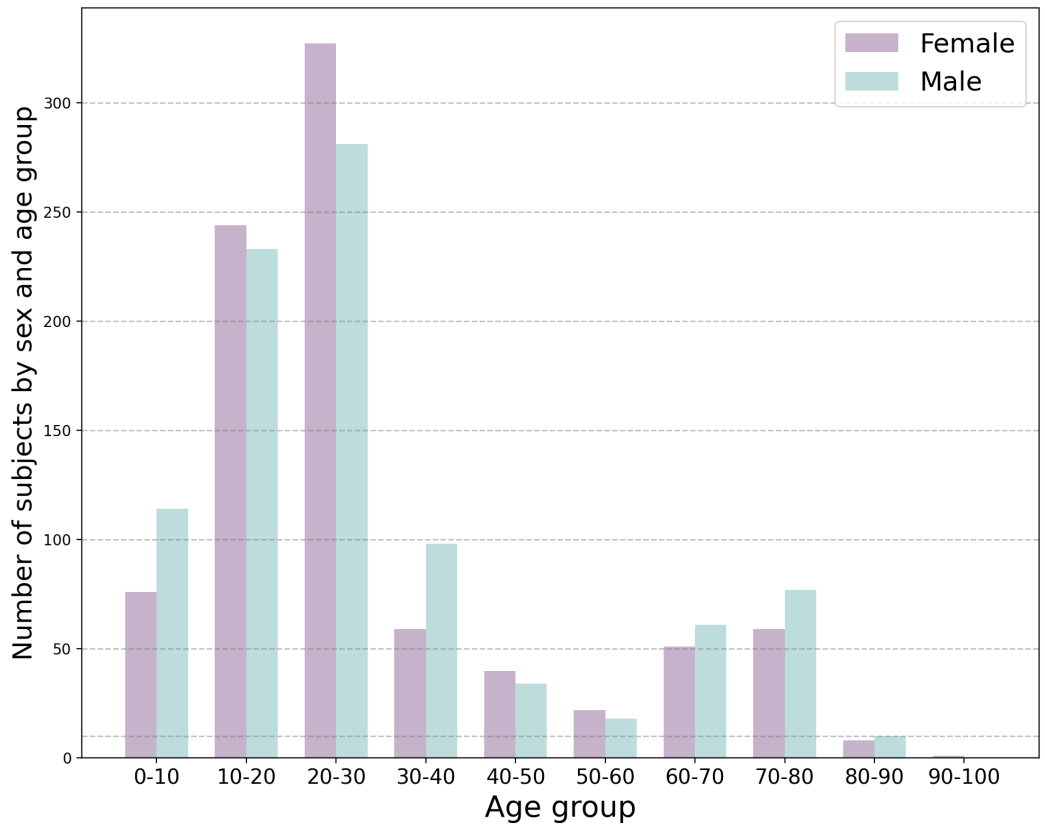

Figure 1: HarMNqEEG dataset demographics. Top Panel: Distribution of individuals in the data set by age and batch. Bottom Panel: Distribution of individuals in the data set by sex and age group. Both figures show that the data set is not uniform in each site or age range.

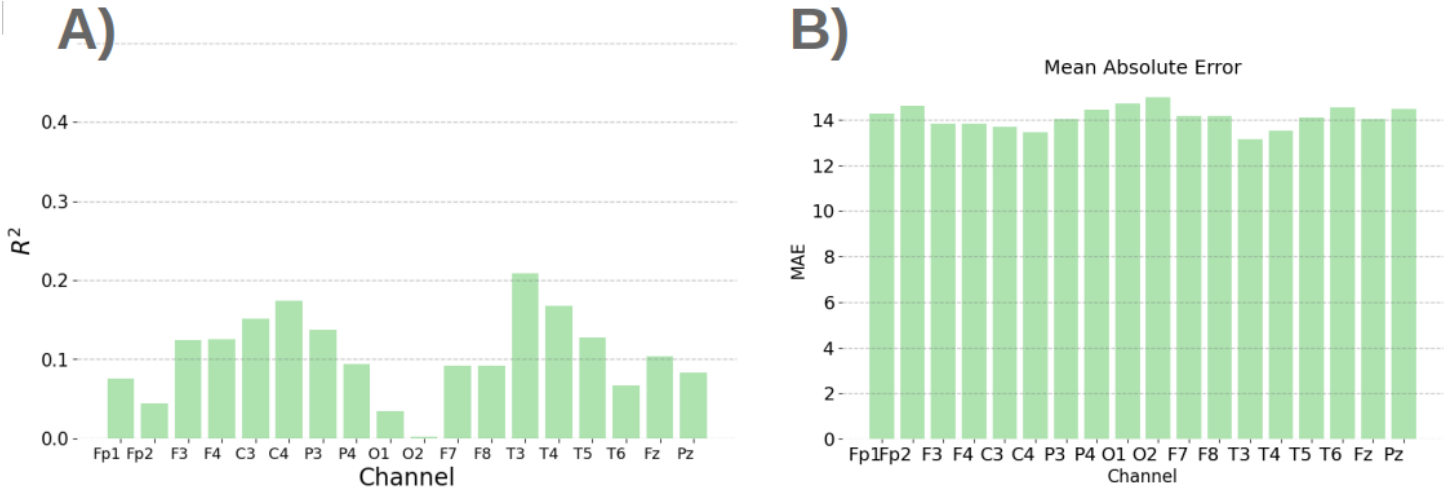

Figure 2: Results for KMER with a linear kernel  $f(\cdot)$ . **A)**  $R^2$ . **B)** Mean Absolute Error.

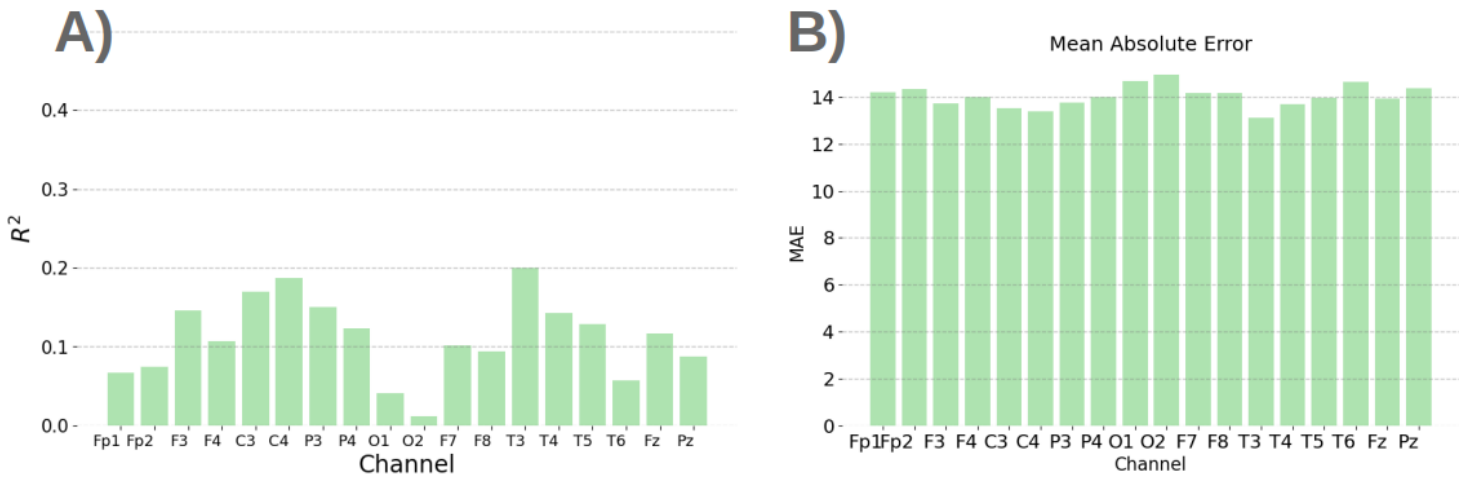

Figure 3: Results for KMER with a polynomial kernel  $f(\cdot)$ . **A)**  $R^2$ . **B)** Mean Absolute Error.

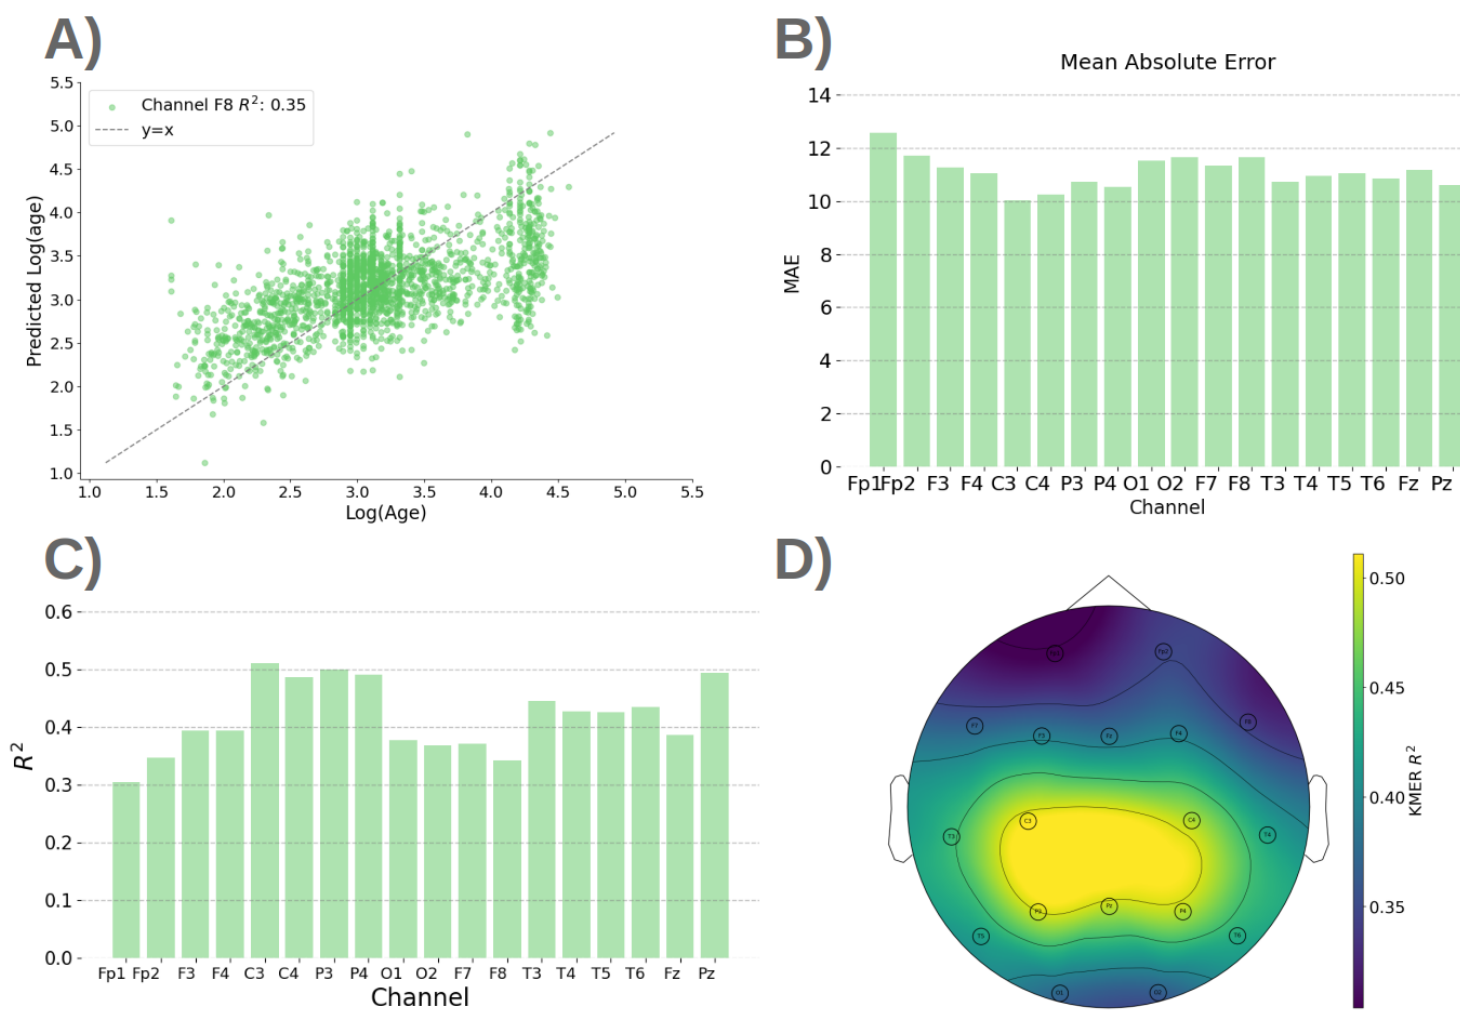

Figure 4: Results for KMER using the logarithmic of age. **A)** Illustration of predicted vs. real age for channel T3. **B)** MAE. **C)**  $R^2$ . **C)**  $R^2$  on a topographic map.

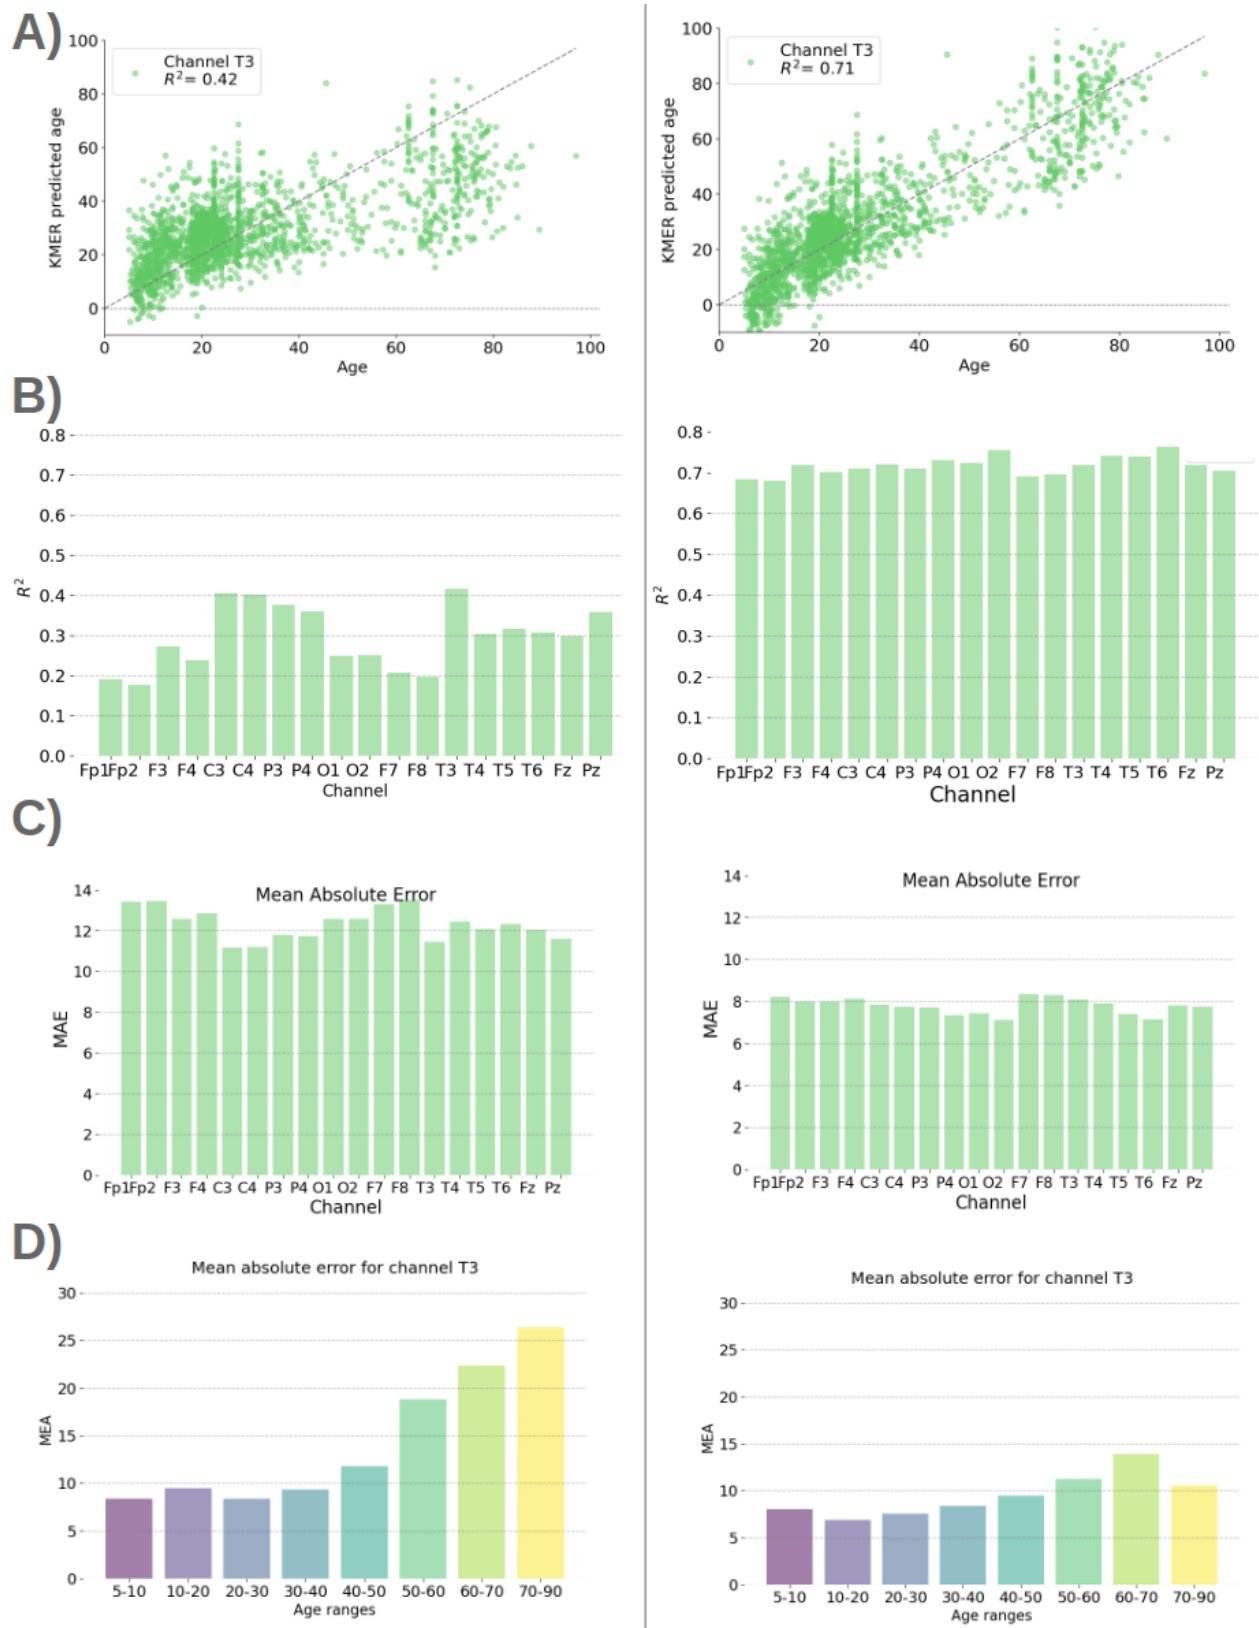

Figure 5: Effect of applying a posthoc bias correction on KMER. Left panels correspond to uncorrected results, and right panels to corrected results. **A)** Illustration of predicted vs. real age for channel T3. **B)** Explained variance  $R^2$  per channel. **C)** MAE per channel. **D)** MAE per age range.

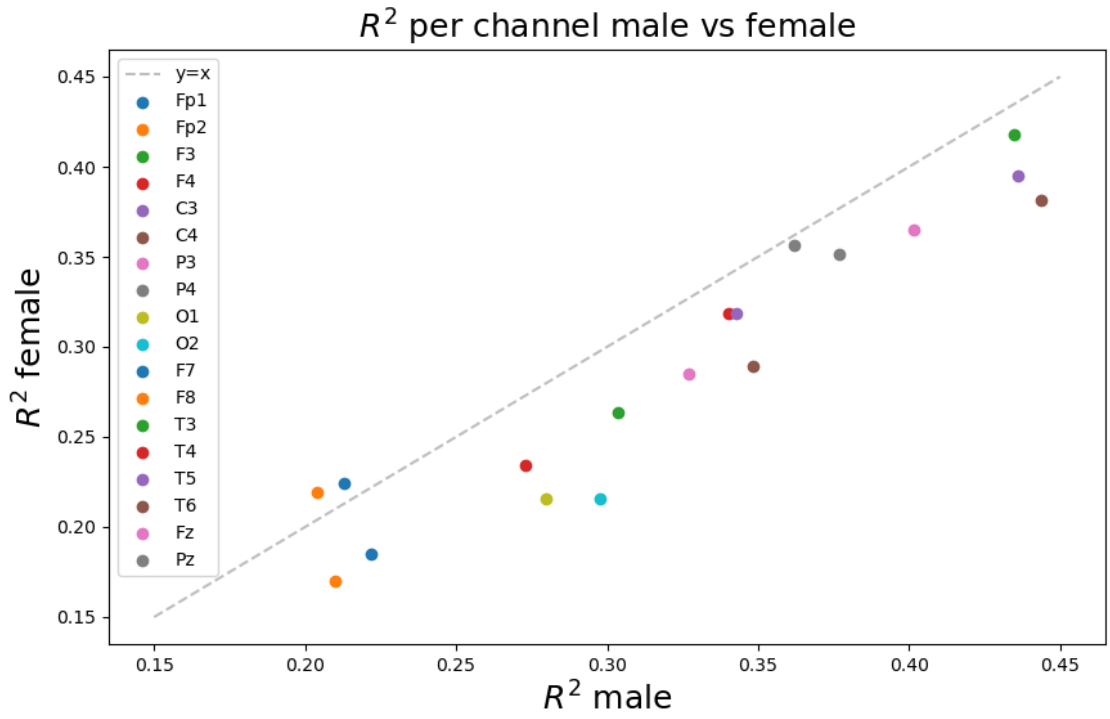

Figure 6: Male vs female accuracies (one point per channel).

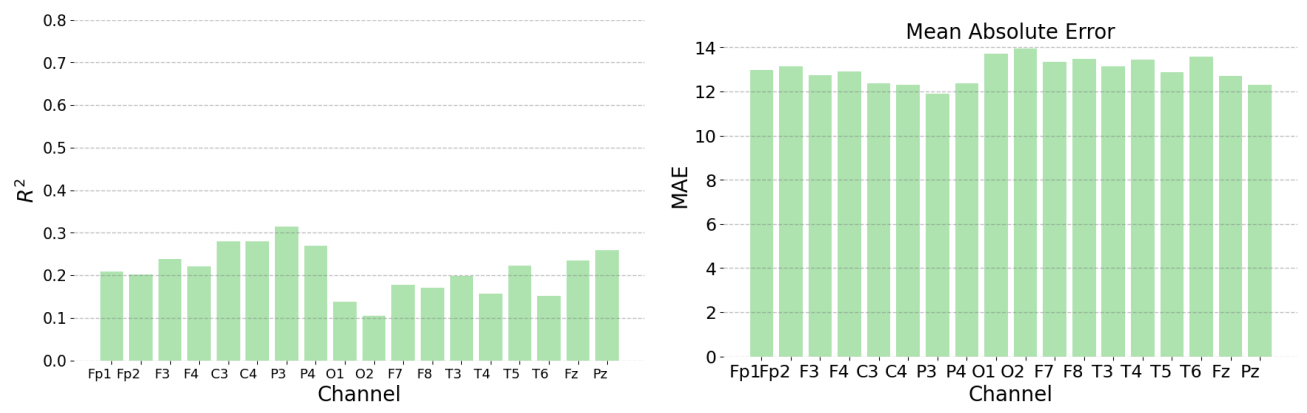

Figure 7: Effect of Normalization.  $R^2$  and MAE for KMER with each bin normalize across subjects (before scaling them to sum to 1) such that the variance is comparable across bins.

## References

- [1] M. L. Bringas Vega, Y. Guo, Q. Tang, F. A. Razzaq, A. Calzada Reyes, P. Ren, D. Paz Linares, L. Galan Garcia, A. G. Rabinowitz, J. R. Galler, J. Bosch-Bayard, and P. A. Valdes Sosa, “An age-adjusted eeg source classifier accurately detects school-aged barbadian children that had protein energy malnutrition in the first year of life,” *Frontiers in Neuroscience*, vol. 13, 2019.
- [2] F. Li, T. Liu, F. Wang, H. Li, D. Gong, R. Zhang, Y. Jiang, Y. Tian, D. Guo, D. Yao, and P. Xu, “Relationships between the resting-state network and the p3: Evidence from a scalp eeg study,” *Scientific Reports*, vol. 5, p. 15129, Oct 2015.
- [3] W. Duan, X. Chen, Y.-J. Wang, W. Zhao, H. Yuan, and X. Lei, “Reproducibility of power spectrum, functional connectivity and network construction in resting-state eeg,” *Journal of Neuroscience Methods*, vol. 348, p. 108985, 2021.
- [4] J. Bosch-Bayard, L. Galan, E. Aubert Vazquez, T. Virues Alba, and P. A. Valdes-Sosa, “Resting state healthy eeg: The first wave of the cuban normative database,” *Frontiers in Neuroscience*, vol. 14, 2020.
- [5] G. Hernandez-Gonzalez, M. L. Bringas-Vega, L. Galán-Garcia, J. Bosch-Bayard, Y. Lorenzo-Ceballos, L. Melie-Garcia, L. Valdes-Urrutia, M. Cobas-Ruiz, P. P. A. Valdes-Sosa, and C. H. B. M. P. (CHBMP), “Multimodal quantitative neuroimaging databases and methods: The cuban human brain mapping project,” *Clinical EEG and Neuroscience*, vol. 42, no. 3, pp. 149–159, 2011. PMID: 21870466.
- [6] P. A. Valdes-Sosa, S. Galan-Garcia, Lidice AU own, L. Valdes-Urrutia, A. C. Evans, and M. J. Valdes-Sosa, “The cuban human brain mapping project, a young and middle age population-based eeg, mri, and cognition dataset,” *Scientific Data*, vol. 8, p. 45, Feb 2021.
- [7] A. Babayan, M. Erbey, D. Kumral, J. D. Reinelt, A. M. F. Reiter, J. Röbbing, H. L. Schaare, M. Uhlig, A. Anwander, P.-L. Bazin, A. Horstmann, L. Lampe, V. V. Nikulin, H. Okon-Singer, S. Preusser, A. Pampel, C. S. Rohr, J. Sacher, A. Thöne-Otto, S. Trapp, T. Nierhaus, D. Altmann, K. Arelin, M. Blöchl, E. Bongartz, P. Breig, E. Cesnaite, S. Chen, R. Cozatl, S. Czerwonatis, G. Dambrauskaite, M. Dreyer, J. Enders, M. Engelhardt, M. M. Fischer, N. Forschack, J. Golchert, L. Golz, C. A. Guran, S. Hedrich, N. Hentschel, D. I. Hoffmann, J. M. Huntenburg, R. Jost, A. Kosatschek, S. Kunzendorf, H. Lammers, M. E. Lauckner, K. Mahjoory, A. S. Kanaan, N. Mendes, R. Menger, E. Morino, K. Nätke, J. Neubauer, H. Noyan, S. Oligschläger, P. Panczyszyn-Trzewik, D. Poehlchen, N. Putzke, S. Roski, M.-C. Schaller, A. Schieferbein, B. Schlaak, R. Schmidt, K. J. Gorgolewski, H. M. Schmidt, A. Schrimpf, S. Stasch, M. Voss, A. Wiedemann, D. S. Margulies, M. Gaebler, and A. Villringer, “A mind-brain-body dataset of mri, eeg, cognition, emotion, and peripheral physiology in young and old adults,” *Scientific Data*, vol. 6, p. 180308, Feb 2019.
- [8] R. Ivanov, F. Kazantsev, E. Zavarzin, A. Klimenko, N. Milakhina, Y. G. Matushkin, A. Savostyanov, and S. Lashin, “Icbraindb: An integrated database for finding associations between genetic factors and eeg markers of depressive disorders,” *Journal of Personalized Medicine*, vol. 12, no. 1, 2022.

- [9] T. Koenig, L. Prichep, D. Lehmann, P. V. Sosa, E. Braecker, H. Kleinlogel, R. Isenhardt, and E. John, “Millisecond by millisecond, year by year: Normative eeg microstates and developmental stages,” *NeuroImage*, vol. 16, no. 1, pp. 41–48, 2002.
- [10] N. Langer, C. C. von Bastian, H. Wirz, K. Oberauer, and L. Jäncke, “The effects of working memory training on functional brain network efficiency,” *Cortex*, vol. 49, no. 9, pp. 2424–2438, 2013.
- [11] H. Ahn, L. Prichep, E. R. John, H. Baird, M. Trepetin, and H. Kaye, “Developmental equations reflect brain dysfunctions,” *Science*, vol. 210, no. 4475, pp. 1259–1262, 1980.
- [12] M. Li, Y. Wang, C. Lopez-Naranjo, S. Hu, R. C. G. Reyes, D. Paz-Linares, A. Areces-Gonzalez, A. I. A. Hamid, A. C. Evans, A. N. Savostyanov, A. Calzada-Reyes, A. Villringer, C. A. Tobon-Quintero, D. Garcia-Agustin, D. Yao, L. Dong, E. Aubert-Vazquez, F. Reza, F. A. Razzaq, H. Omar, J. M. Abdullah, J. R. Galler, J. F. Ochoa-Gomez, L. S. Prichep, L. Galan-Garcia, L. Morales-Chacon, M. J. Valdes-Sosa, M. Tröndle, M. F. M. Zulkify, M. R. B. Abdul Rahman, N. S. Milakhina, N. Langer, P. Rudych, T. Koenig, T. A. Virues-Alba, X. Lei, M. L. Bringas-Vega, J. F. Bosch-Bayard, and P. A. Valdes-Sosa, “Harmonized-multinational qeeg norms (harmnqeeg),” *NeuroImage*, vol. 256, p. 119190, 2022.
